# 1 Estimating Rates of Change to Interpret Quantitative 2 Wastewater Surveillance of Disease Trends 3

4 David A. Holcomb<sup>a,b</sup>, Ariel Christensen<sup>a,c</sup>, Kelly Hoffman<sup>b</sup>, Allison Lee<sup>b</sup>, A. Denene Blackwood<sup>d</sup>,  
5 Thomas Clerkin<sup>d</sup>, Javier Gallard-Góngora<sup>d</sup>, Angela Harris<sup>e</sup>, Nadine Kotlarz<sup>f</sup>, Helena Mitsova<sup>g,h</sup>, Stacie  
6 Reckling<sup>c,g</sup>, Francis L. de los Reyes III<sup>e</sup>, Jill R. Stewart<sup>b</sup>, Virginia T. Guidry<sup>c</sup>, Rachel T. Noble<sup>b,d</sup>, Marc  
7 L. Serre<sup>b</sup>, Tanya P. Garcia<sup>i,†</sup>, Lawrence S. Engel<sup>a,†,\*</sup>

8  
9 <sup>a</sup> Department of Epidemiology, Gillings School of Global Public Health, University of North Carolina  
10 at Chapel Hill, Chapel Hill, NC, USA

11 <sup>b</sup> Department of Environmental Sciences and Engineering, Gillings School of Global Public Health,  
12 University of North Carolina at Chapel Hill, Chapel Hill, NC, USA

13 <sup>c</sup> Occupational & Environmental Epidemiology Branch, Division of Public Health, North Carolina  
14 Department of Health and Human Services, Raleigh, NC, USA

15 <sup>d</sup> Institute of Marine Sciences, Department of Earth, Marine and Environmental Sciences, University of  
16 North Carolina at Chapel Hill, Morehead City, NC, USA

17 <sup>e</sup> Department of Civil, Construction and Environmental Engineering, North Carolina State University,  
18 Raleigh, NC, USA

19 <sup>f</sup> Department of Biological Sciences, North Carolina State University, Raleigh, NC, USA

20 <sup>g</sup> Center for Geospatial Analytics, North Carolina State University, Raleigh, NC, USA

21 <sup>h</sup> Department of Marine, Earth and Atmospheric Sciences, North Carolina State University, Raleigh,  
22 NC, USA

23 <sup>i</sup> Department of Biostatistics, Gillings School of Global Public Health, University of North Carolina at  
24 Chapel Hill, Chapel Hill, NC, USA

25  
26 <sup>†</sup> TG and LE are co-senior authors

27  
28 <sup>\*</sup> Department of Epidemiology, University of North Carolina, CB #7435, Chapel Hill, North Carolina  
29 27599-7435, USA; [Larry.Engel@unc.edu](mailto:Larry.Engel@unc.edu); 919-962-2756

30  
31 The authors declare they have no conflicts of interest related to this work to disclose.  
32

### 33 **Abstract**

34 *Background:* Wastewater monitoring data can be used to estimate disease trends to inform public health  
35 responses. One commonly estimated metric is the rate of change in pathogen quantity, which typically  
36 correlates with clinical surveillance in retrospective analyses. However, the accuracy of rate of change  
37 estimation approaches has not previously been evaluated.

38 *Objectives:* We assessed the performance of approaches for estimating rates of change in wastewater  
39 pathogen loads by generating synthetic wastewater time series data for which rates of change were  
40 known. Each approach was also evaluated on real-world data.

41 *Methods:* Smooth trends and their first derivatives were jointly sampled from Gaussian processes (GP)  
42 and independent errors were added to generate synthetic viral load measurements; the range  
43 hyperparameter and error variance were varied to produce nine simulation scenarios representing  
44 different potential disease patterns. The directions and magnitudes of the rate of change estimates from  
45 four estimation approaches (two established and two developed in this work) were compared to the GP  
46 first derivative to evaluate classification and quantitative accuracy. Each approach was also  
47 implemented for public SARS-CoV-2 wastewater monitoring data collected January 2021 – May 2023  
48 at 25 sites in North Carolina, USA.

49 *Results:* All four approaches inconsistently identified the correct direction of the trend given by the sign  
50 of the GP first derivative. Across all nine simulated disease patterns, between a quarter and a half of all  
51 estimates indicated the wrong trend direction, regardless of estimation approach. The proportion of  
52 trends classified as plateaus (statistically indistinguishable from zero) for the North Carolina SARS-  
53 CoV-2 data varied considerably by estimation method but not by site.

54 *Discussion:* Our results suggest that wastewater measurements alone might not provide sufficient data to  
55 reliably track disease trends in real-time. Instead, wastewater viral loads could be combined with  
56 additional public health surveillance data to improve predictions of other outcomes.

57

## 58 **Introduction**

59           The use of wastewater surveillance to monitor infectious disease expanded dramatically during  
60 the global coronavirus disease 2019 (COVID-19) pandemic, with thousands of monitoring sites active  
61 across dozens of countries by early 2023.<sup>1</sup> Wastewater monitoring offers attractive features for  
62 augmenting surveillance of a wide range of pathogens and other population health-relevant targets, such  
63 as toxic metals and endogenous biomarkers, and may be particularly well-suited as an early warning  
64 system for outbreaks of novel pathogens and variants.<sup>2–7</sup> However, assessing disease *trends* using  
65 wastewater surveillance faces an inherent challenge of interpretation: unlike traditional population  
66 metrics derived from counts of infected, symptomatic, or hospitalized individuals, the quantity of  
67 pathogen markers (e.g., gene targets) measured in wastewater cannot be used directly as a proxy for  
68 community disease burden. The loads of pathogen markers present in wastewater are broadly  
69 proportional to the number of infected individuals shedding the pathogen in their feces—demonstrated  
70 for SARS-CoV-2 by widely reported positive associations between wastewater viral loads and reported  
71 COVID-19 cases—but numerous biological, environmental, and site-specific factors can differentially  
72 impact measurements of wastewater pathogen loads at any given place and time.<sup>8–12</sup>

73           A common strategy for interpreting wastewater pathogen loads is to estimate traditional disease  
74 metrics like incidence rate or effective reproduction number.<sup>12–17</sup> Such metrics are typically estimated by  
75 exploiting statistical associations between wastewater pathogen loads and reported cases,  
76 hospitalizations, etc. at a given site or by constructing mechanistic models of fecal shedding to estimate  
77 the number of community infections required to produce the pathogen loads measured in the  
78 community’s wastewater. These strategies require additional assumptions and data to implement, such  
79 as geographically and temporally aligned population surveillance data or pathogen-specific fecal  
80 shedding distributions. Such data, however, are often unavailable for novel pathogens and are subject to  
81 change unpredictably over the course of an outbreak or pandemic.<sup>17–19</sup>

82 An alternative strategy for interpreting wastewater pathogen loads is to assess trends over time  
83 by comparing the loads measured at different time points within the same location. Because assessing  
84 trends within-site helps to control for site-specific factors that influence pathogen load measurements, an  
85 increasing trend in wastewater measurements should correspond to an increase in infections in the  
86 community. Useful information about the direction and speed at which community infection trends are  
87 changing may therefore be inferred solely on the basis of wastewater measurements by estimating the  
88 slope of the wastewater trend at specific times, where the sign and magnitude of the slope provide the  
89 direction and rate of change, respectively.<sup>20</sup>

90 During the COVID-19 pandemic, the United States Centers for Disease Control and Prevention  
91 (CDC) described a simple regression-based approach for estimating the rate of change in SARS-CoV-2  
92 wastewater trends over small subsets of wastewater viral load data.<sup>21,22</sup> A refinement of this approach  
93 was suggested that uses reported daily COVID-19 case counts to impute wastewater viral loads on  
94 unmonitored days before applying linear regression to estimate rates of change.<sup>20</sup> Both approaches  
95 produce estimated slopes (the rate of change) and associated standard errors that can be used for trend  
96 classification: a positive and statistically significant slope means the trend is increasing, a negative and  
97 significant slope means the trend is decreasing, and a slope that is not statistically significant (regardless  
98 of the sign) indicates the trend is not meaningfully changing and is classified as a plateau.<sup>18</sup> Rate of  
99 change estimates from both approaches have been compared with population-based metrics (e.g.,  
100 reported cases) but, to the best of our knowledge, the estimation performance and trend classification  
101 accuracy of either approach has not yet been evaluated.<sup>18,20</sup>

102 We developed a simulation-based approach to evaluate rate of change estimates using synthetic  
103 time series data for which the underlying smooth trends and their rates of change were known exactly.  
104 We sampled from Gaussian processes (GP) to jointly simulate smooth wastewater viral load trends and  
105 their first derivatives.<sup>23–25</sup> Independent random errors were introduced to the simulated trends to  
106 generate synthetic measurements of wastewater viral loads, varying the smoothness of the trends and the

107 magnitude of the errors to represent a range of potential infectious disease patterns. We evaluated four  
108 rate of change estimation approaches: the linear regression approach described by CDC, the multivariate  
109 imputation approach proposed by Al-Faliti et al. (2022), a modified univariate imputation approach  
110 requiring only wastewater measurements, and a continuous smoothing approach using generalized  
111 additive models (GAM) with numerical approximation to estimate the smooth trend and its first  
112 derivative.<sup>20,21,26,27</sup> These candidate approaches were applied to the synthetic wastewater data and  
113 evaluated by comparing their rate of change estimates to the simulated GP derivatives. Finally, all four  
114 approaches were applied to public wastewater monitoring data from 25 North Carolina sewersheds to  
115 assess the impact of estimation method on the interpretation of trends in a real-world context.

116

## 117 **Methods**

### 118 *Rate of Change Estimation Approaches*

119 All analyses were performed in R version 4.2.2.<sup>28,29</sup> R packages used are denoted by italics.

### 120 Rolling Regressions by Sampling Event

121 CDC National Wastewater Surveillance System (NWSS) recommends analyzing trends in  
122 measured wastewater viral loads by fitting simple linear regression models to a minimum of the three  
123 most-recent wastewater samples for a given location. These models use log-transformed viral load ( $\log_{10}$   
124 gene copies/day) as the response variable and date as the predictor variable.<sup>20–22</sup> When fit to three  
125 observations of weekly wastewater samples or five observations of twice-weekly samples, the regression  
126 coefficient corresponds to the slope of the trend—the average daily change in viral load—over the  
127 preceding ~15 days. The estimated rate of change can also be expressed as percent daily change (PDC),  
128 enabling more direct comparison with trends in other metrics.<sup>21</sup> We estimated the rate of change on each  
129 day of sample collection by fitting rolling linear models to wastewater viral loads measured on the  
130 estimation day and the preceding four sampling events (five observations total).<sup>21,30</sup> For event  $i$  of  $N$   
131 sampling events, let  $\mathbf{y}_i = [y_{i-4}, \dots, y_i]^T$  denote the  $\log_{10}$ -transformed wastewater viral loads and  
132  $\mathbf{z}_i = [z_{i-4}, \dots, z_i]^T$  denote the sampling dates. The rate of change estimate is given by  $\beta$  in

$$\mathbf{y}_i = \beta_0 + \mathbf{z}_i\beta + \boldsymbol{\epsilon}_i, \quad (1)$$

133 where we assume independent, normally distributed residuals  $\boldsymbol{\epsilon}_i = [\epsilon_{i-4}, \dots, \epsilon_i]^T$ .

134

### 135 Rolling Regressions on Imputed Daily Observations

#### 136 *Multivariate Imputation*

137 While clinical and syndromic surveillance of infectious disease outcomes (e.g., incident cases,  
138 hospitalizations, and deaths) are generally reported at daily resolution, wastewater surveillance programs  
139 typically sample less frequently, often once or twice a week.<sup>22,31</sup> Rate of change estimates based on

140 small subsets of wastewater observations are subject to substantial uncertainty and temporal  
141 variability.<sup>18,32</sup> To address the temporal sparsity of wastewater data, Al-Faliti et al. used daily reported  
142 cases to impute wastewater viral loads on unsampled days.<sup>20</sup> Daily rates of change were estimated using  
143 rolling linear models applied over 21- or 28-day subsets of the imputed daily wastewater viral loads.  
144 Following the approach of Al-Faliti et al., we constructed five complete daily viral load datasets using  
145 the *mice* package to implement multivariate imputation using chained equations (MICE) with random  
146 forest models.<sup>33</sup> We used  $\log_{10}$  wastewater viral loads and a 7-day moving average of daily cases as  
147 inputs to MICE. We modified the original approach slightly by log-transforming the averaged cases for  
148 computational stability and specifying a consistent 20 iterations of the MICE algorithm for each dataset  
149 we imputed.<sup>34</sup> From the five resulting complete daily datasets, we selected the realization demonstrating  
150 the highest Spearman rank correlation between 7-day average cases and the imputed daily wastewater  
151 viral loads for downstream analyses, as specified by the method developers. For the selected  
152 multivariate-imputed daily dataset, we estimated the rate of change on each original sampling day by  
153 applying the rolling linear model approach described previously to the 21 daily observations ending on  
154 the estimation day.

155

## 156 Univariate Imputation

157 The multivariate imputation approach relied on daily reported case data but a key motivation for  
158 estimating rates of change in wastewater surveillance data is to enable identification and interpretation  
159 of infectious disease trends using only wastewater surveillance data (i.e., when reported case data are  
160 unavailable or inadequate). We therefore also implemented a univariate time series imputation approach  
161 that used only the measured wastewater viral loads to impute viral loads on unmonitored days.  
162 Univariate imputation was conducted by Kalman smoothing on structural time series models using the  
163 *imputeTS* package.<sup>35</sup> Kalman smoothing has previously been shown to flexibly estimate smooth trends  
164 in wastewater viral loads on both synthetic and various real-world wastewater surveillance data.<sup>32</sup>

165 However, as a discrete-time autoregressive approach that assumes equal-sized time steps, Kalman  
166 smoothing does not provide a direct way to estimate the rate of change and corresponding uncertainty of  
167 the modeled trend. As such, we used Kalman smoothing trend estimates to impute wastewater viral  
168 loads on unsampled days, then estimated the rate of change on each original sampling day by applying  
169 21-day window rolling linear models to the imputed dataset.

170

### 171 First Derivatives of Smooth Functions of Time

172 Substantial fluctuations over short timescales in both measured wastewater viral loads and  
173 reported infections have motivated the use of a variety of smoothing approaches to better characterize  
174 infectious disease trends from noisy surveillance data.<sup>20,26,36</sup> Many common smoothing techniques,  
175 including simple moving averages and locally weighted scatterplot smoothing (LOESS), use the values  
176 of neighboring observations within a user-defined window to estimate smoothed values.<sup>17,18,20,37</sup> Such  
177 techniques are entirely data-dependent and do not have simple mathematical representations like those  
178 from the methods previously presented. Common time series approaches like Kalman smoothing assume  
179 equally spaced time steps and can only provide smooth estimates at discrete time points.<sup>38,39</sup> By contrast,  
180 approaches that estimate continuous, smooth functions of time from the observed data can be evaluated  
181 at any arbitrary time point to obtain the corresponding estimate of the smooth trend. This feature  
182 provides a straightforward means of estimating the rate of change in the smooth trend at any moment  
183 during the monitoring period using finite differences to numerically approximate the first derivative.<sup>38</sup>

184 We used generalized additive models to estimate smoothed wastewater viral loads as continuous  
185 functions of time (see Supplemental Material, Smoothing with Generalized Additive Models). GAMs  
186 are a flexible extension of the generalized linear model that have previously been shown to provide  
187 accurate estimates of wastewater SARS-CoV-2 viral loads.<sup>26,27,40</sup> We used the *mgcv* package to estimate  
188 GAMs by restricted maximum likelihood (REML) using  $\log_{10}$  wastewater viral load as the response and  
189 study date as a smooth predictor term. We specified a cubic regression spline basis and the lesser of 100



190 or half the number of observations as the maximum basis dimension.<sup>27,41</sup> Daily first derivatives and their  
191 corresponding pointwise 95% confidence intervals (CI) were estimated from GAM fits using the *gratia*  
192 package.<sup>42</sup>

193

#### 194 *Simulating Differentiable Time Series*

##### 195 Simulating Smooth Trends with Known Rates of Change

196 We simulated wastewater trends and corresponding rates of change by sampling from Gaussian  
197 processes with squared exponential kernel covariance functions. A GP represents a distribution over all  
198 the possible smooth functions of a continuous domain (e.g., time) and is defined by its covariance  
199 function  $k(z_i, z_j)$  that relates any pair of time points  $z_i, z_j$  on that domain.<sup>23,38,43</sup> The time-derivative of a  
200 GP is also a GP with a covariance kernel function  $k'(z_i, z_j)$  equal to the derivative of the original  
201 covariance function with respect to times  $z_i$  and  $z_j$ .<sup>24,25</sup> This feature enables us to simulate both a smooth  
202 trend and its instantaneous rate of change at any finite set of time points by jointly sampling from the GP  
203 and its derivative, which follow a multivariate normal distribution (see Supplemental Material, Gaussian  
204 Process Derivatives).<sup>25,44</sup>

205 The squared exponential kernel covariance function is given by

$$k(z_i, z_j | \alpha, \rho) = \alpha^2 \exp\left(-\frac{1}{2} \left(\frac{z_i - z_j}{\rho}\right)^2\right), \quad (2)$$

206 where  $\alpha$  is the marginal standard deviation, a scale hyperparameter that controls the magnitude of the  
207 covariance.<sup>25</sup> The rate at which correlation decays with increasing distance between times  $z_i$  and  $z_j$  is  
208 controlled by the range hyperparameter  $\rho$ . Smaller values of  $\rho$  indicate that correlation decays more  
209 quickly, so that each observation provides less information about observations at other time points. The  
210 result is a more rapidly changing, wiggly function. Conversely, larger values of  $\rho$  mean each  
211 observation offers greater information about its temporal neighbors, producing a more slowly changing,  
212 or smoother, trend. We implemented the squared exponential kernel and its derivatives (see

213 Supplemental Material, Squared Exponential Kernel Function) as  $\mathbf{R}$  functions and jointly sampled trend  
214 observations and derivatives using the *mvnfast* package.<sup>44,45</sup>

215

## 216 Generating Synthetic Wastewater Measurements

217 Synthetic wastewater viral load time series data (in  $\log_{10}$  copies/day) were generated by jointly  
218 sampling a smooth trend and its first derivative from a GP at 1000 sequential integer locations to  
219 represent a 1000-day monitoring period with daily trend realizations. Independent random errors  
220  $\epsilon_t^{ww} \sim N(0, \sigma^2)$  with standard deviation  $\sigma$  were independently sampled on each day  $t$  and added to the  
221 corresponding trend value  $x_t$  to simulate the daily wastewater  $\log_{10}$  viral load measurement  
222  $y_t^{ww} = x_t + \epsilon_t^{ww}$ . We down-sampled the synthetic wastewater measurements by selecting every third,  
223 then fourth, observation in an alternating pattern to represent a typical twice-weekly wastewater  
224 sampling frequency, denoted  $y_i^{ww,obs} = y_{t[i]}^{ww}$  for the  $i^{\text{th}}$  of  $N$  simulated sampling events.<sup>46</sup> Although our  
225 primary aim was estimating rates of change using wastewater measurements alone, implementing the  
226 multivariate imputation approach required simulating daily reported case counts that shared an  
227 underlying trend with the simulated wastewater viral loads. We sampled daily cases from a Poisson  
228 distribution with the daily log-incidence rate given by the sum of the GP trend, independent Gaussian  
229 error, and a constant mean log-incidence rate determined mechanistically for an assumed sewershed  
230 population of 200,000 (see Supplemental Material, Simulating Reported Case Counts).<sup>12</sup>

231

## 232 *Evaluating Performance of Rate of Change Estimation Approaches*

### 233 Simulation Scenarios

234 We evaluated the rate of change estimation performance for three values of  $\rho$  so as to have  
235 varying smoothness of trends, and three values of  $\sigma$  so as to control the magnitude of variation of  
236 synthetic observations around the trend. In total, we had nine simulation scenarios. Range

237 hyperparameter values of  $\rho = 90$ ,  $\rho = 30$ , and  $\rho = 15$  days were selected to produce more smooth  
238 (slowly changing), moderately smooth, and less smooth (wiggly) trends, respectively.<sup>38</sup> The GP  
239 marginal standard deviation  $\alpha = 1$  was used for all simulations, such that the uncorrelated variance  $\sigma^2$   
240 was a quarter of the autocorrelated trend variance  $\alpha^2$  for the less-noisy condition  $\sigma = 0.5$ ;  
241 approximately half the trend variance for the moderate condition  $\sigma = 0.75$ ; and equal to the trend  
242 variance for  $\sigma = 1$ . We generated 1000 synthetic datasets under each scenario and estimated the rate of  
243 change on each designated “sampling event” day (i.e., the third and seventh day of each seven-day  
244 period) by each of the four approaches (rolling linear models, multivariate imputation, univariate  
245 imputation, and generalized additive models).

246         Implementing an estimation approach over the entire synthetic dataset corresponds to a  
247 retrospective analysis in which previously collected data are analyzed to characterize past trends.  
248 However, active wastewater monitoring programs are primarily concerned with identifying changes in  
249 infection trends in near real-time, updating estimates as new data become available.<sup>22</sup> For the rolling  
250 linear model approach these analyses are identical, as only the five most recent observations are  
251 analyzed for each estimation day. By default, the imputation and GAM approaches make use of the  
252 entire set of observations, but in real-time analyses they would be limited to only the data collected up to  
253 each estimation time point. Accordingly, we also implemented a modified local GAM approach  
254 (“rolling GAM”) that refit the GAM to only the subset of data already observed by the day for which the  
255 rate of change was being estimated. Locally restricted rolling imputations were not implemented:  
256 multiple imputation was too computationally intensive to feasibly perform across all simulation  
257 scenarios and iterations, while for univariate imputation, the maximum likelihood estimation  
258 underpinning the Kalman smoothing too often failed to converge, halting the simulations. The global  
259 imputation approaches provide upper bounds on the performance of these approaches by incorporating  
260 future information into the imputations while only using a limited window of antecedent imputed  
261 observations to estimate the rate of change on a given day.

262

263 Performance Metrics

264 For each simulated 1000-day surveillance period, we estimated the rate of change by each  
265 approach on all days with a corresponding synthetic wastewater viral load measurement after the first 90  
266 days (a three-month baseline data collection period to accommodate the different minimum sample sizes  
267 required by each approach), for a total of 260 estimates per approach. The rate of change estimate  $RC_{t[i]}^k$   
268 for approach  $k$  was compared with the sampled GP first derivative  $x'_{t[i]}$  on day  $t$  corresponding to viral  
269 load observation  $i$  to assess pointwise estimation performance. The pointwise performance indicators  
270 were summarized across all estimates for a given simulated time series to calculate performance metrics  
271 for each approach. Performance metric distributions were further characterized as the median, 2.5%, and  
272 97.5% quantiles of each metric across all 1000 simulations of each simulation scenario. Quantitative  
273 accuracy was assessed by the root mean square error,  $RMSE^k = \sqrt{\frac{1}{N} \sum_{i=1}^N (RC_{t[i]}^k - x'_{t[i]})^2}$ .<sup>17</sup> The 95%  
274 CI coverage (the proportion of 95% CIs containing the true rate of change) and average width (distance  
275 between the upper and lower 95% CI bounds) served as indicators of quantitative precision.

276 Each estimate was also classified as increasing or decreasing according to the sign of the point  
277 estimate (positive or negative, respectively, as the point estimate was never exactly zero).<sup>18</sup> The rate of  
278 change estimate at observation  $i$  was considered a true positive (TP) when both the point estimate and  
279 true rate of change were positive ( $RC_{t[i]}^k > 0$  and  $x'_{t[i]} > 0$ ); a true negative (TN) for  $RC_{t[i]}^k < 0$  and  
280  $x'_{t[i]} < 0$ ; a false positive (FP) for  $RC_{t[i]}^k > 0$  but  $x'_{t[i]} < 0$ ; and a false negative (FN) for  $RC_{t[i]}^k < 0$   
281 but  $x'_{t[i]} > 0$ . We assessed binary classification performance by sensitivity, the proportion of true  
282 increasing trends correctly classified as increasing, and specificity, the proportion of true decreasing  
283 trends correctly classified as decreasing:

$$\begin{aligned} \text{sensitivity}^k &= \frac{TP^k}{TP^k + FN^k} \\ \text{specificity}^k &= \frac{TN^k}{TN^k + FP^k} \end{aligned} \tag{3}$$

284 CDC suggests a third class, plateau, corresponding to low rates of change that may not warrant a  
285 response.<sup>18,21</sup> In practice, however, plateaus are classified on the basis of a statistical test and identify  
286 trends with rates of change that the estimator cannot confidently differentiate from zero. Because the  
287 simulated true trend and its rate of change are known exactly, there is no directly equivalent definition  
288 available to classify true plateaus for evaluating multiclass performance. We instead incorporated the  
289 concept of varying confidence in class predictions by considering the probability that the trend was  
290 increasing. We estimated the probability of an increasing trend by computing the proportion of a rate of  
291 change estimate's 95% CI that was greater than zero. A CI that covered only positive rates of change  
292 was assigned a 100% probability of belonging to the increasing class, while a CI that included only  
293 negative rates of change was considered to have a 0% probability of increasing. For a CI that included  
294 zero, we computed the probability of an increasing trend by dividing the rate of change value at the CI's  
295 upper bound by the width of the CI. We performed receiver operating characteristic (ROC) curve  
296 analysis with the *yardstick* package to incorporate trend class probability into the binary classification  
297 performance assessment.<sup>47</sup> Sensitivity and specificity were calculated using each observed class  
298 probability as the threshold for classifying an increasing trend, which generated an ROC curve tracing  
299 the sensitivity-specificity trade-off across probability thresholds. We used the area under the curve  
300 (AUC) to assess classification performance when treating the rate of change estimation approach as a  
301 probabilistic classifier.<sup>48</sup>

302

303 *Application: North Carolina SARS-CoV-2 Wastewater Viral Loads*

304 We obtained publicly available data on wastewater SARS-CoV-2 per-capita viral loads and  
305 COVID-19 cases for 25 North Carolina sewersheds from the NC Department of Health and Human  
306 Services (NCDHHS) COVID-19 Wastewater Monitoring Dashboard.<sup>49</sup> Detailed procedures for sample  
307 collection, laboratory analysis, and data processing have been described previously.<sup>46,50</sup> Ten sewersheds  
308 began reporting viral loads in January 2021, with nine sewersheds added in June 2021, five more in  
309 October–November 2021, and a single addition in March 2022. We analyzed data collected through  
310 24 May 2023, when COVID-19 case reporting ended statewide. The publicly available data listed a  
311 count of 2 for any day with 1 – 4 cases to protect privacy and no value (missing) for days with no new  
312 cases, with COVID-19 incidence reported as daily new cases per 10,000 sewershed population. We  
313 scaled by the reported sewershed population and rounded to the nearest integer to recover daily case  
314 counts, substituting 0 for missing counts and a random integer from 1 – 4 with equal probability for any  
315 recovered counts of 2. Wastewater per-capita viral loads were  $\log_{10}$ -transformed for all analyses,  
316 yielding units of  $\log_{10}$  copies/person/day; data were provided with imputed values already substituted for  
317 non-detects, as described previously.<sup>46,50</sup>

318 For each sewershed, we estimated the rate of change on the date of each wastewater sample  
319 (after an initial 90-day baseline monitoring period) via the four estimation approaches and classified  
320 each estimate as increasing, decreasing, or plateau.<sup>21</sup> We compared rate of change estimates to the first  
321 derivative of the global trend estimated by the GAM fit to the full dataset for each sewershed (“global  
322 GAM”). Agreement between the global GAM estimates and the four local estimation approaches  
323 informed only by antecedent observations was assessed using the same metrics as for the simulation  
324 study.

325

326 *Approval and Availability Statement*

327           No human participants were involved in this research. All analyses were performed on synthetic  
328 or publicly available, aggregated data and did not require ethical approval. The code and data to perform  
329 these analyses are freely available in a permanent online repository at  
330 <https://doi.org/10.17605/OSF.IO/BPGN4> (see Supplemental Material, Analysis Code). The original NC  
331 sewershed monitoring data may be accessed at <https://covid19.ncdhhs.gov/dashboard/data-behind->  
332 dashboards.

333 **Results**

334 *Simulation Study*

335 Scenarios

336 Figure 1 presents examples of the synthetic wastewater viral load data we generated for each  
337 simulation scenario. As expected, the  $\rho = 90$  days,  $\sigma = 0.5 \log_{10}$  copies/day scenario produced the  
338 smoothest trend and least noisy observations, whereas the  $\rho = 15$  days,  $\sigma = 1 \log_{10}$  copies/day  
339 scenario produced the most wiggly trend with the noisiest observations. The trend first derivatives,  
340 corresponding to the rate of change, were influenced only by the value of  $\rho$  (Figure 1b). The smoothest  
341 scenarios ( $\rho = 90$ ) produced rates of change with the smallest magnitudes, while the wigglier  $\rho = 15$   
342 scenarios produced much larger magnitude rates of change.

343



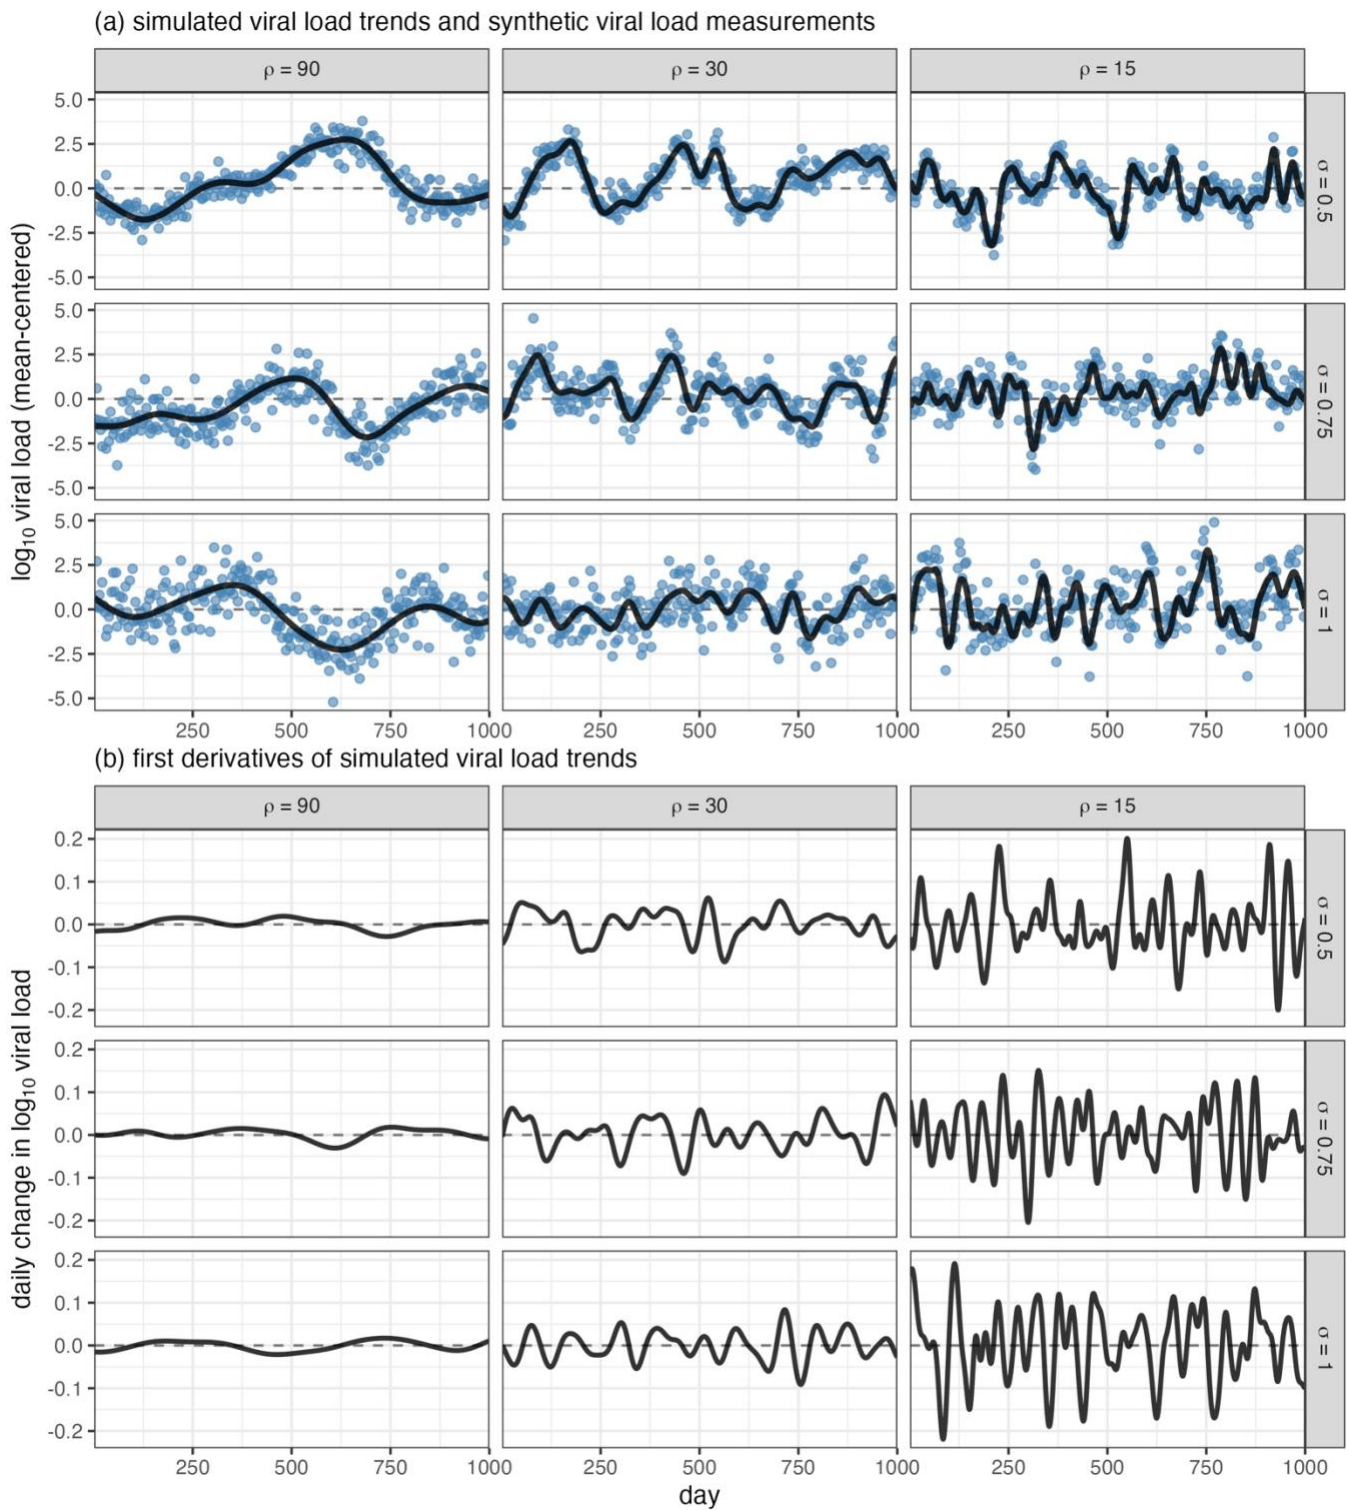

344  
345  
346  
347  
348  
349

Figure 1. Illustrative realizations of (a) simulated wastewater viral load trend (black line) and synthetic observations (blue points) and (b) first derivative of simulated wastewater viral load trend for nine scenarios with varying specifications of the Gaussian process (GP) range parameter  $\rho$  and independent random error standard deviation  $\sigma$

## 350 Rate of Change Estimates

351 Under the moderate  $\rho = 30$  days,  $\sigma = 0.75 \log_{10}$  copies/day simulation scenario, the global  
352 GAM approach generally produced smooth estimates that largely tracked both the simulated trend  
353 (Figure 2a) and its rate of change (Figure 2b). By contrast, the four local estimation approaches yielded  
354 more disjointed estimates that broadly oscillated around the true rate of change, with the rolling GAM  
355 and univariate imputation point estimates appearing to track the truth more closely and the rolling linear  
356 model swinging more dramatically between estimates. The rolling linear model estimates also exhibited  
357 the highest uncertainty, with the widest 95% CIs on average (Table S1); univariate imputation estimates  
358 typically had the narrowest CIs, which frequently did not include the true rate of change given by the GP  
359 derivative. Both the global and rolling GAM estimates generally covered the true rate of change with  
360 their 95% CIs. The rolling GAM estimates had greater uncertainty. This uncertainty resulted because  
361 each estimate was made at the extreme of the range of the observed data without the benefit of future  
362 observations to the right of the estimation point that were available to the global GAM (except for the  
363 final observation, for which the approaches, as expected, converged to identical estimates).<sup>40</sup> Both  
364 imputation approaches and the rolling GAM also appeared to lag somewhat during periods of more  
365 rapid change in the trend, observable in Figure 2b as the right-ward shift in the estimated rate of change  
366 relative to the GP derivative.

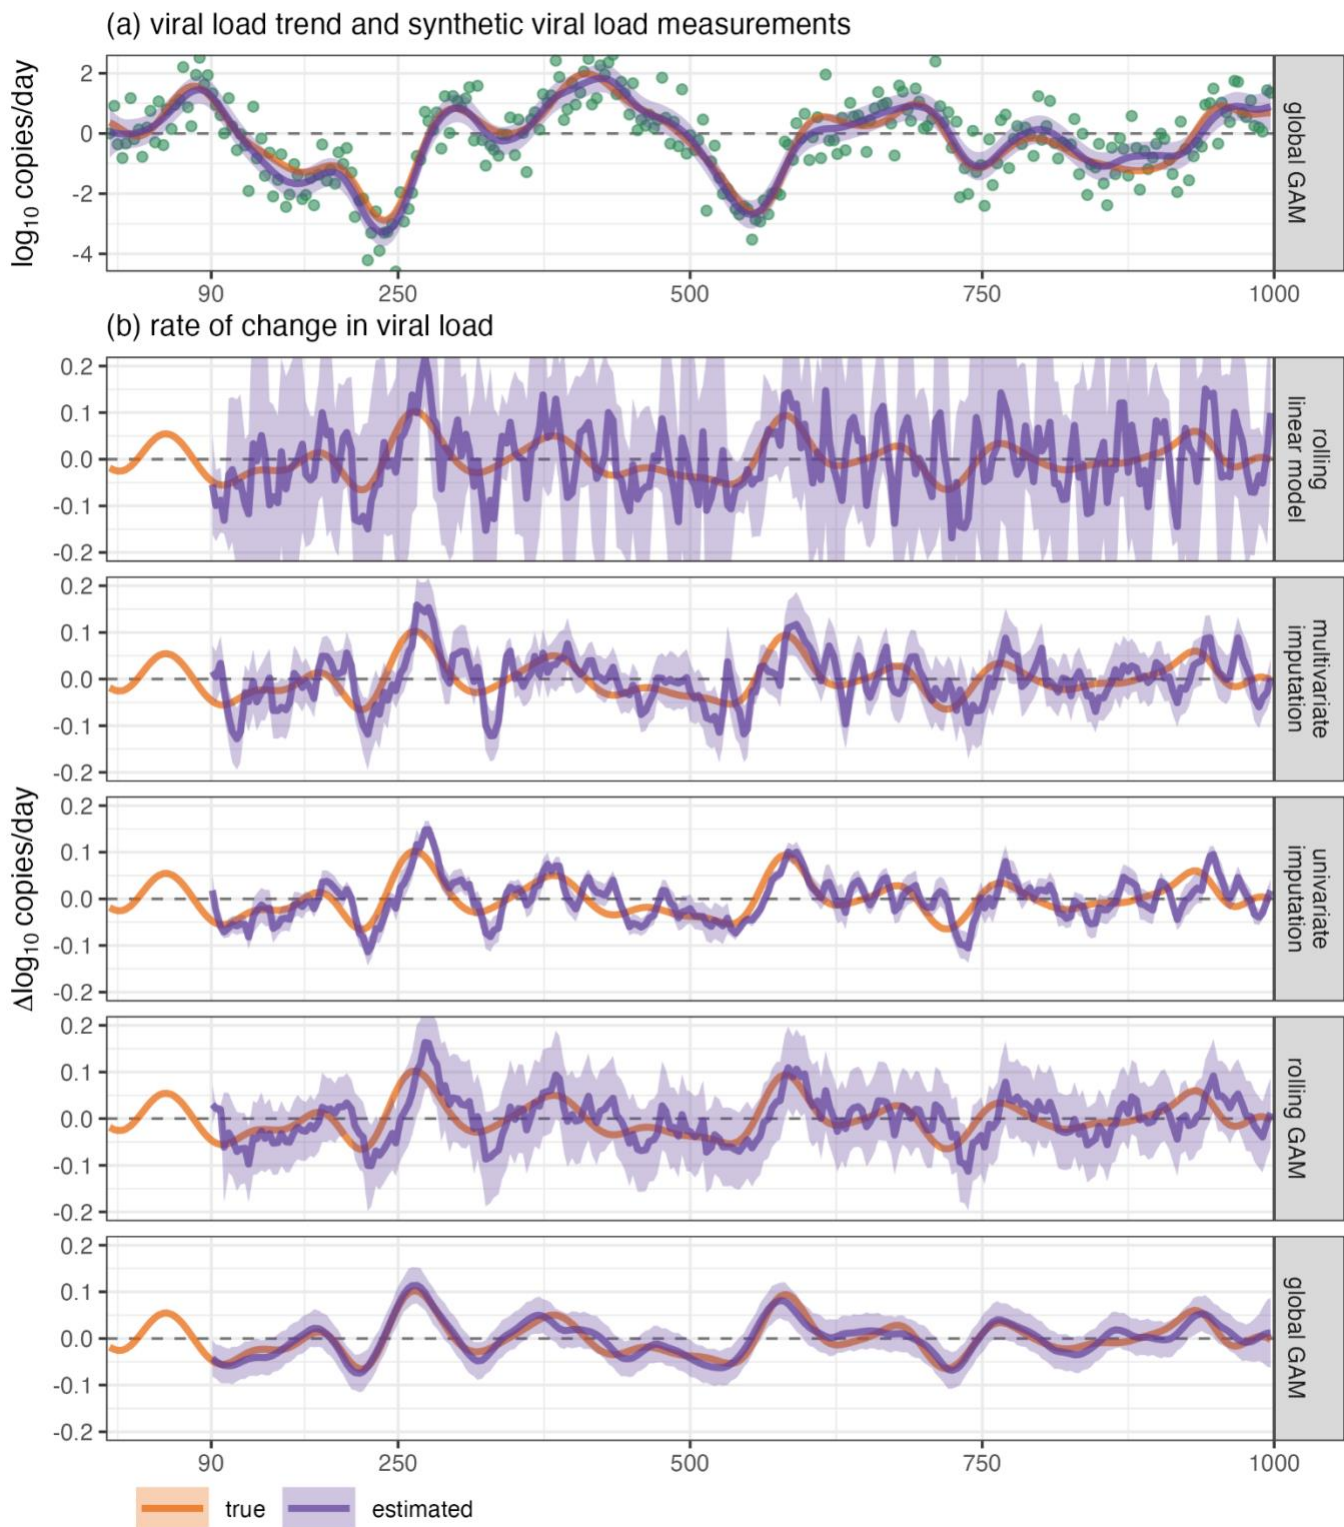

367  
368 Figure 2. True (simulated) and estimated (a) viral load trend and (b) rate of change in viral load by each  
369 of the candidate estimation approaches for one realization of the moderately smooth, moderately noisy  
370 ( $\rho = 30, \sigma = 0.75$ ) simulation scenario. The synthetic measurements used to fit all models are  
371 displayed as green points.  
372

373 Estimation Performance

374 Across all nine scenarios, the global GAM—which utilized more data than an ongoing, real-time  
375 wastewater monitoring program would have access to—consistently produced the most accurate  
376 estimates, as indicated by lowest RMSE (Figure 3a). For the smoothest scenarios ( $\rho = 90$  days), the  
377 rolling GAM exhibited similarly high accuracy regardless of the magnitude of the noise parameter  $\sigma$ ,  
378 followed by the univariate imputation approach, multivariate imputation, and finally by the rolling linear  
379 model approach, which was considerably less accurate and more impacted by increasing noise variance.  
380 However, the differences in accuracy between approaches diminished for less-smooth trends as RMSE  
381 increased, such that the RMSE distributions were similar across all four local estimation approaches  
382 (median RMSE: 0.06 – 0.08  $\Delta\log_{10}$  copies/day) for the least-smooth ( $\rho = 15$ ) scenarios with low ( $\sigma =$   
383 0.5) and moderate ( $\sigma = 0.75$ ) noise variance.

384 Although the rolling linear model estimates generally had the widest 95% CIs (Figure 2b), they  
385 also most consistently included the true rate of change in about 95% of intervals, the target coverage  
386 proportion (Figure 3b). The uncertainty of global GAM estimates, while much narrower than for the  
387 rolling linear model, was overly conservative, with median coverage  $>95\%$  for the smoother and less  
388 noisy scenarios. Univariate imputation had coverage proportions appreciably  $<95\%$  for all but the  
389 smoothest scenarios. The multivariate imputation approach also generally had coverage proportions that  
390 were  $<95\%$ . The median 95% CI coverage of rolling and global GAM estimates remained relatively  
391 high across all scenarios, but both approaches demonstrated large variability in interval coverage across  
392 iterations of the more challenging (less smooth, noisier) scenarios. GAMs appear to be susceptible to  
393 estimating inappropriately smooth trends under such conditions, as observed in the essentially flat trend  
394 with narrow 95% CIs estimated by the global GAM for the  $\rho = 30, \sigma = 1$  scenario in Figure S4.<sup>26</sup> Such  
395 over-smoothing appears to occur more frequently when GAMs are fit to high-variance (relative to  $\alpha$ )  
396 synthetic measurements generated from wiggly trends, which can produce an essentially uniform cloud  
397 of observations that envelop and obscure the trend ( $\rho = 30, \sigma = 1$  scenario in Figure 1a).

398           The relative performance of each approach at correctly classifying the trend as increasing or  
399 decreasing was consistent across the nine simulation scenarios (Figure 3c). The global GAM  
400 consistently demonstrated the highest median AUC, although AUCs were more variable across  
401 iterations of the wigglier and noisier scenarios. Under the smoothest trend scenarios ( $\rho = 90$ ), the  
402 rolling GAM estimates had the highest median AUC among the local estimation approaches, but also  
403 greater variability in AUC. Rolling linear models exhibited the lowest median AUC at just over 50%—  
404 only slightly better than chance. Intriguingly, the AUC of rolling linear models improved as trend  
405 smoothness decreased and the AUC of all other approaches degraded; for the wiggliest scenarios  
406 ( $\rho = 15$ ), the rolling linear model median AUC was equal to or greater than any of the other local  
407 models. The rolling GAM approach provided the least accurate trend classifications in the least smooth,  
408 most noisy scenario, likely related to the propensity for GAMs to over-smooth under such conditions.<sup>26</sup>  
409 By contrast, the univariate imputation approach performed fairly consistently across less-smooth  
410 scenarios, regardless of the noise variance, potentially due to the overly precise estimates providing  
411 more weight when the sign was correct (as was the case for the majority of estimates). However, no  
412 local estimation approach consistently achieved median sensitivities, specificities, or AUCs above 80%  
413 for any scenario (Table S1), indicating that none of these approaches would reliably classify pandemic  
414 trends as increasing or decreasing in near real-time as part of an ongoing wastewater monitoring  
415 program.  
416



(a) root mean square error

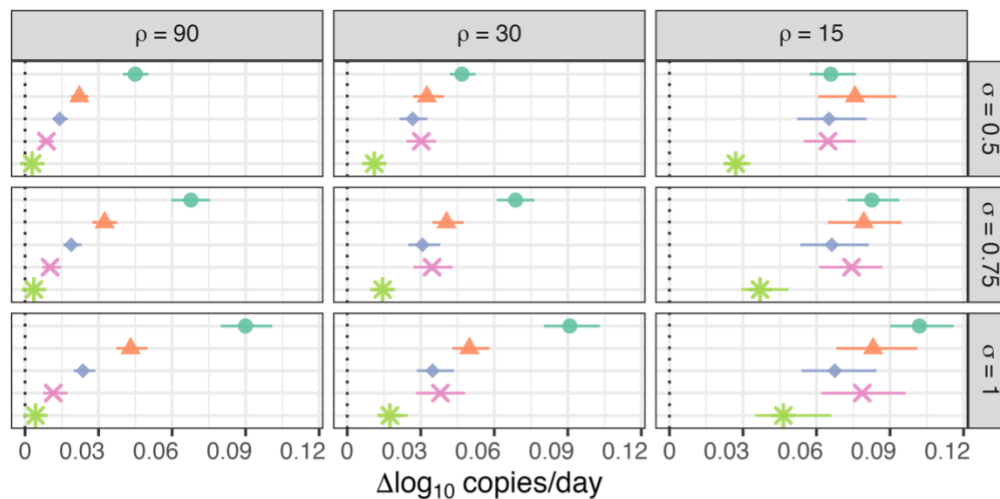

(b) 95% CI coverage

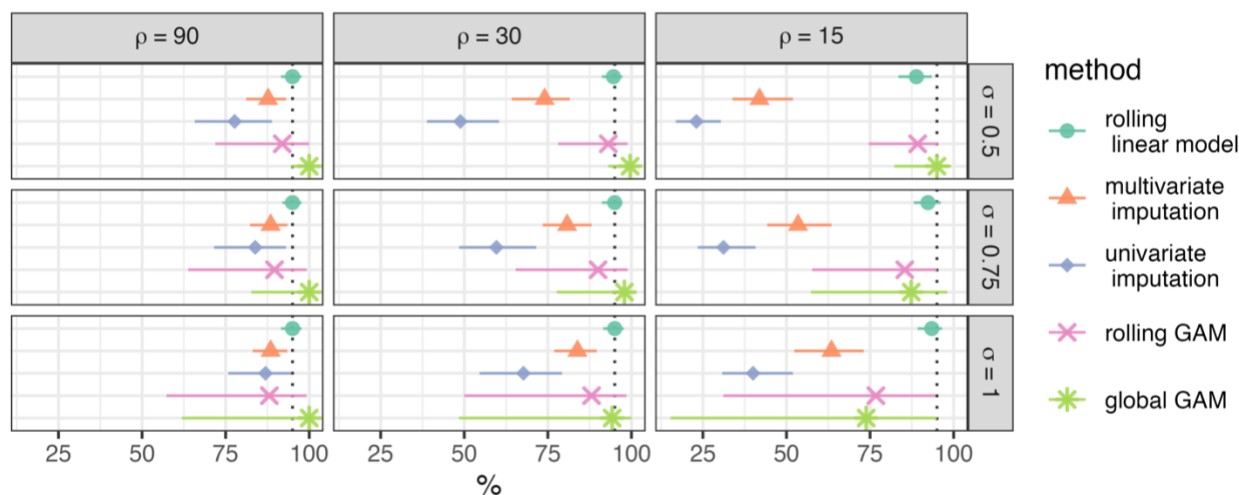

(c) area under the curve (binary classifier)

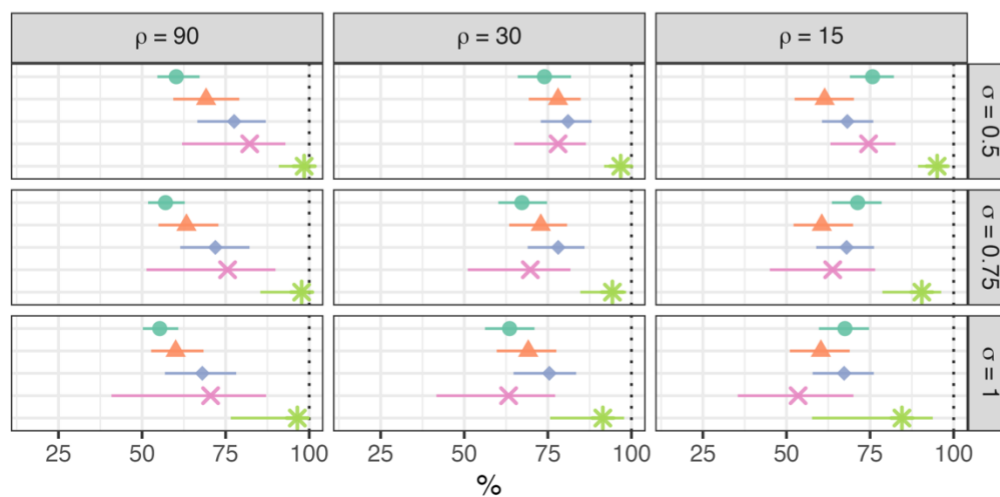

417  
418  
419  
420  
421

Figure 3. Median and 2.5<sup>th</sup> – 97.5<sup>th</sup> percentiles of performance metrics for candidate rate of change estimation approaches across 1000 realizations of each of the nine simulation scenarios. Vertical dotted lines indicate the target performance for each metric.

422 *SARS-CoV-2 Trends in North Carolina Sewersheds*

423           The 25 NC sewersheds that we analyzed served populations ranging from 3500 – 550,000 people  
424 and were monitored over periods of 431 – 871 days, with SARS-CoV-2 viral loads reported for 121 –  
425 245 wastewater samples at each site (Table S2). The lowest median per-capita viral loads were observed  
426 in the Wilmington sewershed, at 3.7 million copies/person/day (interquartile range [IQR] 7.6 million  
427 copies/person/day), with the highest viral loads observed at the Cary 3 site (median (IQR): 36.8 (44.3)  
428 million copies/person/day). The measured wastewater viral loads and global GAM-estimated trend,  
429 along with the corresponding rate of change estimates by each approach assessed in the simulation  
430 study, are presented separately for each sewershed in Figures S7 – S31. Concordance between the global  
431 GAM rate of change estimates and the local model estimates were similar between approaches except  
432 for rolling linear model estimates, which exhibited somewhat higher and more variable RMSE across  
433 the 25 sewersheds (Figure S6). As in the simulation study, the rolling linear model estimates had the  
434 widest 95% CIs but also included the mean global GAM estimate at approximately the target proportion  
435 of 95%. Likewise, the univariate imputation approach had the narrowest average 95% CIs, which failed  
436 to cover the majority of GAM estimates.

437           Under the three-class system, in which rate of change estimates are classified as increasing or  
438 decreasing only when their 95% confidence intervals exclude zero, the univariate imputation approach  
439 also consistently identified the highest proportion of estimates as clearly increasing or decreasing and  
440 the fewest as plateaus across all sites (Figure 4). The majority of estimates were classified as plateaus by  
441 each of the other approaches, while only one site (Roanoke Rapids) was majority plateau (53%) by the  
442 univariate imputation approach (Table S3). The proportion of estimates deemed plateaus was highest  
443 (often >90%) by either the rolling linear model or the rolling GAM approaches, except in Jacksonville,  
444 where the global GAM classified all but one estimate as plateau (Figure S20). Approximately three-  
445 quarters of global GAM estimates and two-thirds of multivariate imputation estimates were identified as  
446 plateaus. The relative frequency at which each estimation approach classified trends as plateaus matched

447 between the NC data and the simulated data under the moderate ( $\rho = 30$ ) and least smooth ( $\rho = 15$ )  
448 scenarios, although the global GAM produced fewer plateau calls than did the univariate imputation for  
449 the smoothest ( $\rho = 90$ ) simulation scenarios (Figure S5). All approaches identified both increasing and  
450 decreasing trends at each site, but we observed appreciable variation between approaches in the ratio of  
451 increasing to decreasing trend classifications.  
452



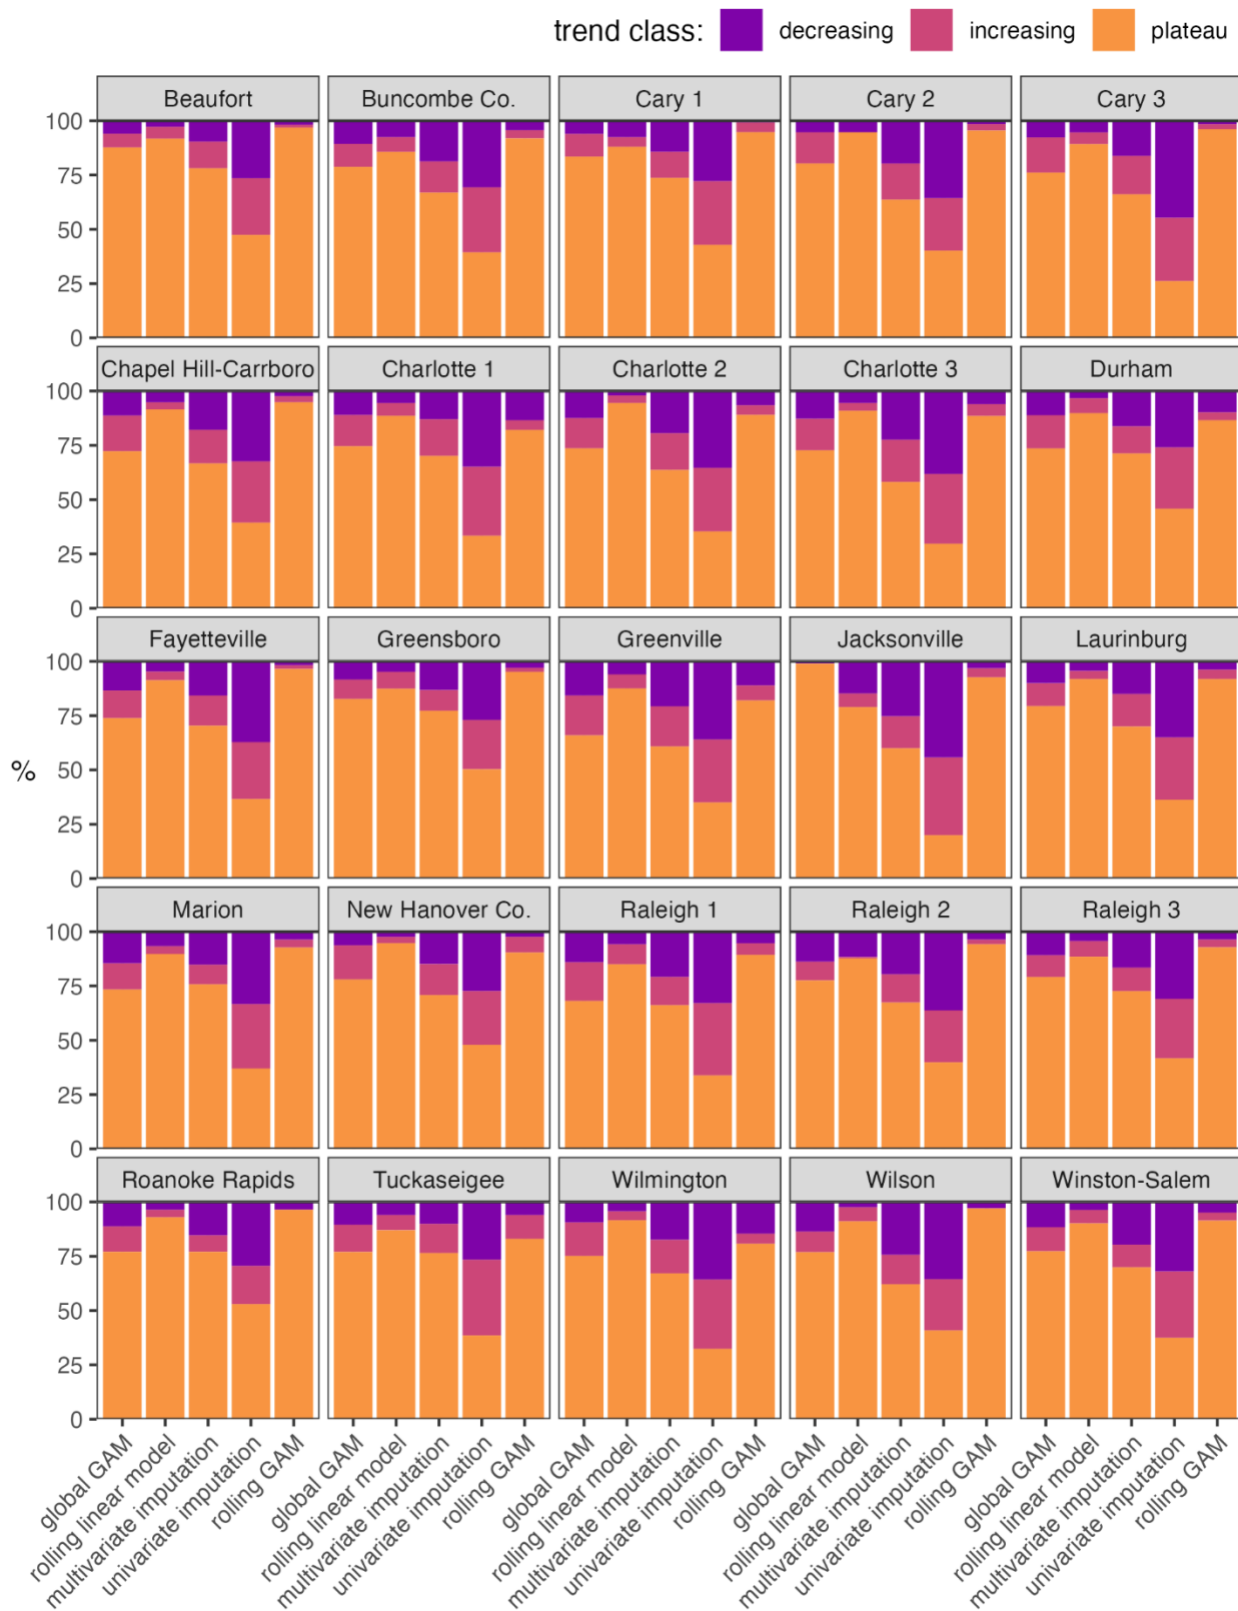

453  
454  
455  
456

Figure 4. Percentage of estimates classified as decreasing (purple), increasing (mauve), or plateau (orange) trends by each rate of change estimation approach for 25 North Carolina Sewersheds.

457 **Discussion**

458 Approaches for classifying viral load trends and estimating their rates of change in wastewater  
459 monitoring programs have not, to our knowledge, previously been compared for accuracy and reliability.  
460 Because trends and their slopes are not directly measured, we generated synthetic wastewater viral load  
461 time series using Gaussian processes to simulate a range of potential patterns of disease trends with  
462 known first derivatives. We implemented four rate of change estimation approaches—two previously  
463 reported and two developed herein—representing routine trend assessments from a typical, twice-  
464 weekly wastewater monitoring program that could reasonably be utilized by public health authorities  
465 without specialized statistical expertise. When applied to the synthetic time series data, all of the  
466 approaches showed only modest reliability in identifying the correct direction of the trend. The median  
467 agreement between the signs of the estimated and true rates of change typically ranged between 50%  
468 and 75%, corresponding to at least one out of every four trend assessments (i.e., once every two weeks)  
469 providing misleading conclusions about the direction of the trend. This result raises concerns about the  
470 ability to take appropriate action (e.g., issuing alerts in response to apparently increasing trends)  
471 informed by such trend classification approaches.

472 The addition of plateau-class trends in a three-class system partially addresses this modest  
473 reliability by requiring greater certainty before identifying trends as increasing or decreasing. As  
474 currently defined in wastewater surveillance applications, plateau status is not an inherent property of  
475 the trend but rather the product of a conventional decision criterion that the rate of change estimate was  
476 not significantly different from zero at the 5% significance level.<sup>51</sup> Both the magnitude of the estimate  
477 and the precision with which it was estimated affect whether statistical significance was achieved,  
478 meaning that trends classified as plateau may have been changing too slowly to warrant attention or that  
479 the rate of change estimate was too uncertain to confidently determine the direction of change. The  
480 choice of estimation approach consistently impacted the proportion of estimates deemed plateau, though  
481 these patterns appeared mostly related to the precision of the rate of change estimates, with the

482 inappropriately precise imputation-based approaches identifying a larger proportion of non-plateau  
483 trends. The plateau concept implies a trade-off between making a potentially incorrect determination  
484 (e.g., classifying as decreasing a trend that is truly increasing) against failing to make a determination  
485 (i.e., classifying as plateau) when conditions are in fact meaningfully changing. However, by conflating  
486 two distinct concerns—the magnitude of change and estimation uncertainty—the existing plateau  
487 definition does not directly address key questions of what is a meaningful rate of change to warrant  
488 further attention and how to balance the costs of incorrect action vs. inaction when meaningful changes  
489 in the trend are underway. Such considerations may be informally addressed by selecting more or less  
490 aggressive classification approaches or by varying the significance threshold. Greater transparency  
491 would be afforded by explicitly specifying the threshold above which rates of change would be  
492 considered meaningful, as when Keshaviah et al. specified the doubling of wastewater viral quantities as  
493 a component of an algorithm to detect infection surges.<sup>36</sup> As of December 2023, CDC NWSS similarly  
494 published fixed categories defined by the percent change in viral load over the previous 15 days to  
495 classify trends, with changes  $\geq 100\%$  considered “large” increases.<sup>52,53</sup>

496 Both quantitative and classification accuracy differed between approaches, but the differences  
497 were generally observed only for smoother trends. As trends oscillated more rapidly with decreasing  $\rho$ ,  
498 method performance degraded such that all were essentially equally poor. This dependence on  
499 characteristics of the trend itself suggests that even highly performing approaches may not be suitable in  
500 all contexts and anticipated trend smoothness should be considered when selecting a rate of change  
501 estimation approach to apply at a given monitoring site and time. While trend smoothness may be  
502 directly characterized by estimating GP range hyperparameters from previously collected monitoring  
503 data, fitting GPs is non-trivial—particularly estimating the weakly identified covariance function  
504 hyperparameters—and may be generally infeasible outside academic settings.<sup>43,54,55</sup> Informal  
505 smoothness assessments may prove sufficient, for example by visually comparing global GAM-  
506 estimated trends to representative GP simulations across a range of  $\rho$  values. Both strategies rely on the

507 assumption that future trends will be similar to those already observed, for which adequate data to  
508 characterize trend smoothness may be unavailable, particularly after the emergence of a novel pathogen.

509 To aid interpretability, we simulated wastewater trends using a simple GP with zero global mean  
510 and a squared exponential covariance function with constant marginal standard deviation  $\alpha$  and a single  
511 temporal range hyperparameter  $\rho$  across the entire simulated monitoring period. These conditions do not  
512 fully reflect the real-world complexity of infectious disease trends. However, the flexibility of GPs  
513 readily allows extension of our simulation approach to represent smooth trends of far greater  
514 complexity. For example, the GP may be specified with multiple additive Matérn covariance functions  
515 (of which the squared exponential is a special case) to introduce fluctuations at multiple time scales, or  
516 with alternative covariance structures that represent specific physical processes (though non-Matérn  
517 functions may not be readily differentiable).<sup>23,43,46,56,57</sup>

518 The broad utility of wastewater surveillance, particularly in detecting emerging pathogen  
519 lineages, has been widely demonstrated.<sup>58–60</sup> However, effectively leveraging wastewater measurements  
520 alone to estimate the rate of change of disease trends in real-time (i.e., on the day of the most recent  
521 measurement) has proved particularly challenging. While retrospective estimation of temporal trends  
522 and their rates of change by global GAMs was reasonably accurate in our simulation study and credible  
523 when applied to observed SARS-CoV-2 viral loads in NC sewersheds, real-time estimates are made at  
524 the extreme range of the data where uncertainty is greatest (as illustrated by the rolling GAM's much  
525 noisier estimates and wider CIs relative to the global GAM). Coupling the most recent viral load  
526 measurement with recent estimated trend values provides a good indication of the neighborhood of  
527 potential values the current trend may take, but is less informative about where the trend is heading.<sup>61</sup>  
528 Rather than attempting to estimate instantaneous rates of change, relative metrics with more  
529 retrospective features, such as the more recently developed CDC NWSS Wastewater Viral Activity  
530 Level metric that compares current viral loads to a long-running, site-specific baseline value, may offer  
531 a more reliable basis for understanding community disease burdens using only wastewater data.<sup>62</sup> As

532 wastewater surveillance data become increasingly relied on, any such wastewater-only metric must be  
533 thoroughly evaluated before being used to identify public health-relevant differences in community  
534 disease burden. We suggest that additional studies focus on using wastewater measurements in context  
535 with other public health metrics, such as hospitalizations or emergency department visits, to enhance  
536 predictions and updating current models to adapt to changing disease dynamics.<sup>63</sup>

537

538

539 **Acknowledgment**

540 We gratefully acknowledge the assistance of Mitham Al-Faliti and Jeseth Delgado Vega in  
541 implementing the multivariate imputation approach. Megan Lott and Joe Brown provided insightful  
542 commentary. This work was supported by the CDC National Wastewater Surveillance System through  
543 the Epidemiology and Laboratory Capacity Cooperative Agreement with North Carolina Department of  
544 Health and Human Services, with additional support from the National Institute for Occupational Health  
545 and Safety (T42OH008673) and the NSF RAPID program (project #2029866). We also thank Steven  
546 Berkowitz and all contributors to the NC Wastewater Monitoring Network, as well as its earlier  
547 incarnation as the NC Wastewater Pathogen Research Network, which received crucial support from the  
548 NC Policy Collaborative.

549

550

## 551 References

- 552 (1) Naughton, C. C.; Roman, F. A., Jr; Alvarado, A. G. F.; Tariqi, A. Q.; Deeming, M. A.; Kadonsky,  
553 K. F.; Bibby, K.; Bivins, A.; Medema, G.; Ahmed, W.; Katsivelis, P.; Allan, V.; Sinclair, R.;  
554 Rose, J. B. Show Us the Data: Global COVID-19 Wastewater Monitoring Efforts, Equity, and  
555 Gaps. *FEMS Microbes* **2023**, *4*, xtad003. <https://doi.org/10.1093/femsmc/xtad003>.
- 556 (2) Bivins, A.; North, D.; Ahmad, A.; Ahmed, W.; Alm, E.; Been, F.; Bhattacharya, P.; Bijlsma, L.;  
557 Boehm, A. B.; Brown, J.; Buttiglieri, G.; Calabro, V.; Carducci, A.; Castiglioni, S.; Cetecioglu  
558 Gurol, Z.; Chakraborty, S.; Costa, F.; Curcio, S.; de los Reyes, F. L.; Delgado Vela, J.; Farkas, K.;  
559 Fernandez-Casi, X.; Gerba, C.; Gerrity, D.; Girones, R.; Gonzalez, R.; Haramoto, E.; Harris, A.;  
560 Holden, P. A.; Islam, Md. T.; Jones, D. L.; Kasprzyk-Hordern, B.; Kitajima, M.; Kotlarz, N.;  
561 Kumar, M.; Kuroda, K.; La Rosa, G.; Malpei, F.; Mautus, M.; McLellan, S. L.; Medema, G.;  
562 Meschke, J. S.; Mueller, J.; Newton, R. J.; Nilsson, D.; Noble, R. T.; van Nuijs, A.; Peccia, J.;  
563 Perkins, T. A.; Pickering, A. J.; Rose, J.; Sanchez, G.; Smith, A.; Stadler, L.; Stauber, C.;  
564 Thomas, K.; van der Voorn, T.; Wigginton, K.; Zhu, K.; Bibby, K. Wastewater-Based  
565 Epidemiology: Global Collaborative to Maximize Contributions in the Fight Against COVID-19.  
566 *Environmental Science & Technology* **2020**, *acs.est.0c02388*.  
567 <https://doi.org/10.1021/acs.est.0c02388>.
- 568 (3) Levy, J. I.; Andersen, K. G.; Knight, R.; Karthikeyan, S. Wastewater Surveillance for Public  
569 Health. *Science* **2023**, *379* (6627), 26–27. <https://doi.org/10.1126/science.ade2503>.
- 570 (4) Rao, G.; Capone, D.; Zhu, K.; Knoble, A.; Linden, Y.; Clark, R.; Lai, A.; Kim, J.; Huang, C.-H.;  
571 Bivins, A.; Brown, J. Simultaneous Detection and Quantification of Multiple Pathogen Targets in  
572 Wastewater. *PLOS Water* **2024**, *3* (2), e0000224. <https://doi.org/10.1371/journal.pwat.0000224>.
- 573 (5) Valdivia-Carrera, C. A.; Ho-Palma, A. C.; Munguia-Mercado, A.; Gonzalez-Pizarro, K.; Ibacache-  
574 Quiroga, C.; Dinamarca, A.; Stehlik, M.; Rusñol, M.; Girones, R.; Lopez-Urbina, M. T.;  
575 Basaldua Galarza, A.; Gonzales-Gustavson, E. Surveillance of SARS-CoV-2, Rotavirus,  
576 Norovirus Genogroup II, and Human Adenovirus in Wastewater as an Epidemiological Tool to  
577 Anticipate Outbreaks of COVID-19 and Acute Gastroenteritis in a City without a Wastewater  
578 Treatment Plant in the Peruvian Highlands. *Science of The Total Environment* **2023**, 167161.  
579 <https://doi.org/10.1016/j.scitotenv.2023.167161>.
- 580 (6) Thai, P. K.; O'Brien, J. W.; Banks, A. P. W.; Jiang, G.; Gao, J.; Choi, P. M.; Yuan, Z.; Mueller, J.  
581 F. Evaluating the In-Sewer Stability of Three Potential Population Biomarkers for Application in  
582 Wastewater-Based Epidemiology. *Science of The Total Environment* **2019**, *671*, 248–253.  
583 <https://doi.org/10.1016/j.scitotenv.2019.03.231>.
- 584 (7) Roy, S.; Tang, M.; Edwards, M. A. Lead Release to Potable Water during the Flint, Michigan  
585 Water Crisis as Revealed by Routine Biosolids Monitoring Data. *Water Research* **2019**, *160*, 475–  
586 483. <https://doi.org/10.1016/j.watres.2019.05.091>.
- 587 (8) Graham, K. E.; Loeb, S. K.; Wolfe, M. K.; Catoe, D.; Sinnott-Armstrong, N.; Kim, S.; Yamahara,  
588 K. M.; Sassoubre, L. M.; Mendoza Grijalva, L. M.; Roldan-Hernandez, L.; Langenfeld, K.;  
589 Wigginton, K. R.; Boehm, A. B. SARS-CoV-2 RNA in Wastewater Settled Solids Is Associated  
590 with COVID-19 Cases in a Large Urban Sewershed. *Environ. Sci. Technol.* **2021**, *55* (1), 488–  
591 498. <https://doi.org/10.1021/acs.est.0c06191>.
- 592 (9) Mantilla-Calderon, D.; Huang, K. (Kevin); Li, A.; Chibwe, K.; Yu, X.; Ye, Y.; Liu, L.; Ling, F.  
593 Meta-Analyses on SARS-CoV-2 Viral RNA Levels in Wastewater and Their Correlations to  
594 Epidemiological Indicators. *Environ. Sci.: Water Res. Technol.* **2022**, *8* (7), 1391–1407.  
595 <https://doi.org/10.1039/D2EW00084A>.
- 596 (10) Hoar, C.; Chauvin, F.; Clare, A.; McGibbon, H.; Castro, E.; Patinella, S.; Katehis, D.; Dennehy, J.  
597 J.; Trujillo, M.; Smyth, D. S.; Silverman, A. I. Monitoring SARS-CoV-2 in Wastewater during  
598 New York City's Second Wave of COVID-19: Sewershed-Level Trends and Relationships to



- 599 Publicly Available Clinical Testing Data. *Environ. Sci.: Water Res. Technol.* **2022**, 8 (5), 1021–  
600 1035. <https://doi.org/10.1039/D1EW00747E>.
- 601 (11) Lott, M. E. J.; Norfolk, W. A.; Dailey, C. A.; Foley, A. M.; Melendez-Delet, C.; Robertson, M. J.;  
602 Rathbun, S. L.; Lipp, E. K. Direct Wastewater Extraction as a Simple and Effective Method for  
603 SARS-CoV-2 Surveillance and COVID-19 Community-Level Monitoring. *FEMS Microbes* **2023**,  
604 4. <https://doi.org/10.1093/femsmc/xtad004>.
- 605 (12) Soller, J.; Jennings, W.; Schoen, M.; Boehm, A.; Wigginton, K.; Gonzalez, R.; Graham, K. E.;  
606 McBride, G.; Kirby, A.; Mattioli, M. Modeling Infection from SARS-CoV-2 Wastewater  
607 Concentrations: Promise, Limitations, and Future Directions. *Journal of Water and Health* **2022**.  
608 <https://doi.org/10.2166/wh.2022.094>.
- 609 (13) Peccia, J.; Zulli, A.; Brackney, D. E.; Grubaugh, N. D.; Kaplan, E. H.; Casanovas-Massana, A.;  
610 Ko, A. I.; Malik, A. A.; Wang, D.; Wang, M.; Warren, J. L.; Weinberger, D. M.; Arnold, W.;  
611 Omer, S. B. Measurement of SARS-CoV-2 RNA in Wastewater Tracks Community Infection  
612 Dynamics. *Nat Biotechnol* **2020**, 38 (10), 1164–1167. <https://doi.org/10.1038/s41587-020-0684-z>.
- 613 (14) Fitzgerald, S. F.; Rossi, G.; Low, A. S.; McAteer, S. P.; O’Keefe, B.; Findlay, D.; Cameron, G. J.;  
614 Pollard, P.; Singleton, P. T. R.; Ponton, G.; Singer, A. C.; Farkas, K.; Jones, D.; Graham, D. W.;  
615 Quintela-Baluja, M.; Tait-Burkard, C.; Gally, D. L.; Kao, R.; Corbishley, A. Site Specific  
616 Relationships between COVID-19 Cases and SARS-CoV-2 Viral Load in Wastewater Treatment  
617 Plant Influent. *Environ. Sci. Technol.* **2021**. <https://doi.org/10.1021/acs.est.1c05029>.
- 618 (15) Omori, R.; Miura, F.; Kitajima, M. Age-Dependent Association between SARS-CoV-2 Cases  
619 Reported by Passive Surveillance and Viral Load in Wastewater. *Science of The Total  
620 Environment* **2021**, 792, 148442. <https://doi.org/10.1016/j.scitotenv.2021.148442>.
- 621 (16) McMahan, C. S.; Self, S.; Rennert, L.; Kalbaugh, C.; Kriebel, D.; Graves, D.; Colby, C.; Deaver, J.  
622 A.; Popat, S. C.; Karanfil, T.; Freedman, D. L. COVID-19 Wastewater Epidemiology: A Model to  
623 Estimate Infected Populations. *The Lancet Planetary Health* **2021**, 5 (12), e874–e881.  
624 [https://doi.org/10.1016/s2542-5196\(21\)00230-8](https://doi.org/10.1016/s2542-5196(21)00230-8).
- 625 (17) Huisman, J. S.; Scire, J.; Caduff, L.; Fernandez-Cassi, X.; Ganesanandamoorthy, P.; Kull, A.;  
626 Scheidegger, A.; Stachler, E.; Boehm, A. B.; Hughes, B.; Knudson, A.; Topol, A.; Wigginton, K.  
627 R.; Wolfe, M. K.; Kohn, T.; Ort, C.; Stadler, T.; Julian, T. R. Wastewater-Based Estimation of the  
628 Effective Reproductive Number of SARS-CoV-2. *Environmental Health Perspectives* **2022**, 130  
629 (5), 057011. <https://doi.org/10.1289/EHP10050>.
- 630 (18) Kotlarz, N.; Holcomb, D. A.; Pasha, A. B. M. T.; Reckling, S.; Kays, J.; Lai, Y.-C.; Daly, S.;  
631 Palani, S.; Bailey, E.; Guidry, V. T.; Christensen, A.; Berkowitz, S.; Hoppin, J. A.; Mitasova, H.;  
632 Engel, L. S.; de los Reyes, F. L.; Harris, A. Timing and Trends for Municipal Wastewater, Lab-  
633 Confirmed Case, and Syndromic Case Surveillance of COVID-19 in Raleigh, North Carolina.  
634 *American Journal of Public Health* **2023**, 113 (1), 79–88.  
635 <https://doi.org/10.2105/AJPH.2022.307108>.
- 636 (19) Chen, W.; Bibby, K. Making Waves: Establishing a Modeling Framework to Evaluate Novel  
637 Targets for Wastewater-Based Surveillance. *Water Research* **2023**, 245, 120573.  
638 <https://doi.org/10.1016/j.watres.2023.120573>.
- 639 (20) Al-Faliti, M.; Kotlarz, N.; McCall, C.; Harris, A. R.; Smith, A. L.; Stadler, L. B.; de los Reyes, F.  
640 L.; Delgado Vela, J. Comparing Rates of Change in SARS-CoV-2 Wastewater Load and Clinical  
641 Cases in 19 Sewersheds Across Four Major Metropolitan Areas in the United States. *ACS EST  
642 Water* **2022**. <https://doi.org/10.1021/acsestwater.2c00106>.
- 643 (21) CDC. *Wastewater Surveillance Data Reporting and Analytics: Trends*; Website; Centers for  
644 Disease Control and Prevention, 2023.  
645 <https://web.archive.org/web/20230923022331/https://www.cdc.gov/nwss/reporting.html>.
- 646 (22) Kirby, A. E.; Walters, M. S.; Jennings, W. C.; Fugitt, R.; LaCross, N.; Mattioli, M.; Marsh, Z. A.;  
647 Roberts, V. A.; Mercante, J. W.; Yoder, J.; Hill, V. R. Using Wastewater Surveillance Data to



- 648 Support the COVID-19 Response — United States, 2020–2021. *MMWR Morb. Mortal. Wkly.*  
649 *Rep.* **2021**, *70* (36), 1242–1244. <https://doi.org/10.15585/mmwr.mm7036a2>.
- 650 (23) Rasmussen, C. E.; Williams, C. K. I. *Gaussian Processes for Machine Learning*; The MIT Press,  
651 2005. <https://doi.org/10.7551/mitpress/3206.001.0001>.
- 652 (24) Solak, E.; Murray-smith, R.; Leithead, W.; Leith, D.; Rasmussen, C. Derivative Observations in  
653 Gaussian Process Models of Dynamic Systems. In *Advances in Neural Information Processing*  
654 *Systems*; MIT Press, 2002; Vol. 15.  
655 [https://proceedings.neurips.cc/paper\\_files/paper/2002/file/5b8e4fd39d9786228649a8a8bec4e008-](https://proceedings.neurips.cc/paper_files/paper/2002/file/5b8e4fd39d9786228649a8a8bec4e008-Paper.pdf)  
656 *Paper.pdf*.
- 657 (25) McHutchon, A. J. *Nonlinear Modelling and Control Using Gaussian Processes*; Dissertation;  
658 University of Cambridge, 2014. <https://mlg.eng.cam.ac.uk/pub/pdf/Mch14.pdf>.
- 659 (26) Arabzadeh, R.; Grünbacher, D. M.; Insam, H.; Kreuzinger, N.; Markt, R.; Rauch, W. Data Filtering  
660 Methods for SARS-CoV-2 Wastewater Surveillance. *Water Science and Technology* **2021**, *84* (6),  
661 1324–1339. <https://doi.org/10.2166/wst.2021.343>.
- 662 (27) Wood, S. N. *Generalized Additive Models: An Introduction with R*, 2nd ed.; Chapman and  
663 Hall/CRC, 2017. <https://doi.org/10.1201/9781315370279>.
- 664 (28) R Core Team. *R: A Language and Environment for Statistical Computing*; Software version 4.2.2;  
665 Vienna, Austria, 2022. <https://www.R-project.org/>.
- 666 (29) Wickham, H.; Averick, M.; Bryan, J.; Chang, W.; McGowan, L. D.; François, R.; Grolemund, G.;  
667 Hayes, A.; Henry, L.; Hester, J.; Kuhn, M.; Pedersen, T. L.; Miller, E.; Bache, S. M.; Müller, K.;  
668 Ooms, J.; Robinson, D.; Seidel, D. P.; Spinu, V.; Takahashi, K.; Vaughan, D.; Wilke, C.; Woo,  
669 K.; Yutani, H. Welcome to the tidyverse. *Journal of Open Source Software* **2019**, *4* (43), 1686.  
670 <https://doi.org/10.21105/joss.01686>.
- 671 (30) Vaughan, D.; Dancho, M. *Tibbletime: Time Aware Tibbles*; R package version 0.1.8.9000; 2023.  
672 <https://github.com/business-science/tibbletime>.
- 673 (31) CDC. *Developing a Wastewater Surveillance Sampling Strategy*; Website; Centers for Disease  
674 Control and Prevention, 2023.  
675 <https://web.archive.org/web/20231030161926/https://www.cdc.gov/nwss/sampling.html>.
- 676 (32) Cluzel, N.; Courbariaux, M.; Wang, S.; Moulin, L.; Wurtzer, S.; Bertrand, I.; Laurent, K.; Monfort,  
677 P.; Gantzer, C.; Guyader, S. L.; Boni, M.; Mouchel, J.-M.; Maréchal, V.; Nuel, G.; Maday, Y. A  
678 Nationwide Indicator to Smooth and Normalize Heterogeneous SARS-CoV-2 RNA Data in  
679 Wastewater. *Environment International* **2022**, *158*, 106998.  
680 <https://doi.org/10.1016/j.envint.2021.106998>.
- 681 (33) van Buuren, S.; Groothuis-Oudshoorn, K. Mice: Multivariate Imputation by Chained Equations in  
682 R. *Journal of Statistical Software* **2011**, *45* (3). <https://doi.org/10.18637/jss.v045.i03>.
- 683 (34) van Buuren, S. *Flexible Imputation of Missing Data, Second Edition*, 2nd ed.; Chapman and  
684 Hall/CRC: New York, 2018. <https://doi.org/10.1201/9780429492259>.
- 685 (35) Moritz, S.; Bartz-Beielstein, T. imputeTS: Time Series Missing Value Imputation in R. *The R*  
686 *Journal* **2017**, *9* (1), 207–218. <https://doi.org/10.32614/RJ-2017-009>.
- 687 (36) Keshaviah, A.; Huff, I.; Hu, X. C.; Guidry, V.; Christensen, A.; Berkowitz, S.; Reckling, S.; Noble,  
688 R. T.; Clerkin, T.; Blackwood, D.; McLellan, S. L.; Roguet, A.; Musse, I. Separating Signal from  
689 Noise in Wastewater Data: An Algorithm to Identify Community-Level COVID-19 Surges in  
690 Real Time. *Proceedings of the National Academy of Sciences* **2023**, *120* (31), e2216021120.  
691 <https://doi.org/10.1073/pnas.2216021120>.
- 692 (37) Rauch, W.; Schenk, H.; Insam, H.; Markt, R.; Kreuzinger, N. Data Modelling Recipes for SARS-  
693 CoV-2 Wastewater-Based Epidemiology. *Environmental Research* **2022**, *214*, 113809.  
694 <https://doi.org/10.1016/j.envres.2022.113809>.
- 695 (38) Simpson, G. L. Modelling Palaeoecological Time Series Using Generalised Additive Models.  
696 *Frontiers in Ecology and Evolution* **2018**, *6*. <https://doi.org/10.3389/fevo.2018.00149>.

- 697 (39) Bertels, X.; Hanoteaux, S.; Janssens, R.; Maloux, H.; Verhaegen, B.; Delputte, P.; Boogaerts, T.;  
698 van Nuijs, A. L. N.; Brogna, D.; Linard, C.; Marescaux, J.; Didy, C.; Pype, R.; Roosens, N. H. C.;  
699 Van Hoorde, K.; Lesenfants, M.; Lahousse, L. Time Series Modelling for Wastewater-Based  
700 Epidemiology of COVID-19: A Nationwide Study in 40 Wastewater Treatment Plants of  
701 Belgium, February 2021 to June 2022. *Science of The Total Environment* **2023**, 899, 165603.  
702 <https://doi.org/10.1016/j.scitotenv.2023.165603>.
- 703 (40) Clark, N. J.; Wells, K. Dynamic Generalised Additive Models (DGAMs) for Forecasting Discrete  
704 Ecological Time Series. *Methods in Ecology and Evolution* **2022**. [https://doi.org/10.1111/2041-](https://doi.org/10.1111/2041-210x.13974)  
705 [210x.13974](https://doi.org/10.1111/2041-210x.13974).
- 706 (41) Wood, S. N. Fast Stable Restricted Maximum Likelihood and Marginal Likelihood Estimation of  
707 Semiparametric Generalized Linear Models. *Journal of the Royal Statistical Society: Series B*  
708 (*Statistical Methodology*) **2011**, 73 (1), 3–36. <https://doi.org/10.1111/j.1467-9868.2010.00749.x>.
- 709 (42) Simpson, G. L. *Gratia: Graceful Ggplot-Based Graphics and Other Functions for GAMs Fitted*  
710 *Using MgcV*; R package version 0.8.1.34; 2023. <https://gavinsimpson.github.io/gratia/>.
- 711 (43) Betancourt, M. *Robust Gaussian Process Modeling*; Blog Post; 2020.  
712 [https://web.archive.org/web/20240320133727/https://betanalpha.github.io/assets/case\\_studies/gau-](https://web.archive.org/web/20240320133727/https://betanalpha.github.io/assets/case_studies/gaussian_processes.html)  
713 [ssian\\_processes.html](https://web.archive.org/web/20240320133727/https://betanalpha.github.io/assets/case_studies/gaussian_processes.html).
- 714 (44) Susmann, H. *Derivatives of a Gaussian Process*; Blog post; 2020.  
715 [https://web.archive.org/web/20240410015709/http://herbsusmann.com/2020/07/06/gaussian-](https://web.archive.org/web/20240410015709/http://herbsusmann.com/2020/07/06/gaussian-process-derivatives/)  
716 [process-derivatives/](https://web.archive.org/web/20240410015709/http://herbsusmann.com/2020/07/06/gaussian-process-derivatives/).
- 717 (45) Fasiolo, M. *An Introduction to Mvncfast*; R package version 0.2.7; 2016.  
718 <http://mfasiolo.github.io/mvncfast/>.
- 719 (46) Hoffman, K.; Holcomb, D.; Reckling, S.; Clerkin, T.; Blackwood, D.; Beattie, R.; de los Reyes, F.;  
720 Harris, A.; Mitsova, H.; Kotlarz, N.; Stewart, J.; Kazenelson, J.; Cahoon, L.; Frampton, A.;  
721 Munir, M.; Lee, A.; Berkowitz, S.; Noble, R.; Guidry, V. T.; Engel, L.; Serre, M.; Christensen, A.  
722 Using Detrending to Assess SARS-CoV-2 Wastewater Loads as a Leading Indicator of  
723 Fluctuations in COVID-19 Cases at Fine Temporal Scales: Correlations across Twenty  
724 Sewersheds in North Carolina. *PLOS Water* **2023**, 2 (10), e0000140.  
725 <https://doi.org/10.1371/journal.pwat.0000140>.
- 726 (47) Kuhn, M.; Vaughan, D.; Hvitfeldt, E. *Yardstick: Tidy Characterizations of Model Performance*; R  
727 package version 1.2.0; 2023. <https://yardstick.tidymodels.org>.
- 728 (48) Fawcett, T. An Introduction to ROC Analysis. *Pattern Recognition Letters* **2006**, 27 (8), 861–874.  
729 <https://doi.org/10.1016/j.patrec.2005.10.010>.
- 730 (49) NCDHHS. *Wastewater Monitoring Dashboard*; Website; North Carolina Department of Health and  
731 Human Services, 2023.  
732 [https://web.archive.org/web/20231206225713/https://covid19.ncdhhs.gov/dashboard/wastewater-](https://web.archive.org/web/20231206225713/https://covid19.ncdhhs.gov/dashboard/wastewater-monitoring)  
733 [monitoring](https://web.archive.org/web/20231206225713/https://covid19.ncdhhs.gov/dashboard/wastewater-monitoring).
- 734 (50) Beattie, R. E.; Blackwood, A. D.; Clerkin, T.; Dinga, C.; Noble, R. T. Evaluating the Impact of  
735 Sample Storage, Handling, and Technical Ability on the Decay and Recovery of SARS-CoV-2 in  
736 Wastewater. *PLOS ONE* **2022**, 17 (6), 1–16. <https://doi.org/10.1371/journal.pone.0270659>.
- 737 (51) Greenland, S. Divergence versus Decision P-Values: A Distinction Worth Making in Theory and  
738 Keeping in Practice: Or, How Divergence P-Values Measure Evidence Even When Decision P-  
739 Values Do Not. *Scandinavian Journal of Statistics* **2023**, 50 (1), 54–88.  
740 <https://doi.org/10.1111/sjos.12625>.
- 741 (52) CDC. *COVID Data Tracker: Wastewater Surveillance*; Website; Centers for Disease Control and  
742 Prevention, 2023. [https://web.archive.org/web/20231217025913/https://covid.cdc.gov/covid-data-](https://web.archive.org/web/20231217025913/https://covid.cdc.gov/covid-data-tracker/#wastewater-surveillance)  
743 [tracker/#wastewater-surveillance](https://web.archive.org/web/20231217025913/https://covid.cdc.gov/covid-data-tracker/#wastewater-surveillance).
- 744 (53) CDC. *Using Wastewater Data to Inform Public Health Action*; Website; Centers for Disease  
745 Control and Prevention, 2023.

- 746 [https://web.archive.org/web/20231209003517/https://www.cdc.gov/respiratory-viruses/whats-](https://web.archive.org/web/20231209003517/https://www.cdc.gov/respiratory-viruses/whats-new/using-wastewater-data.html)  
747 [new/using-wastewater-data.html](https://web.archive.org/web/20231209003517/https://www.cdc.gov/respiratory-viruses/whats-new/using-wastewater-data.html).
- 748 (54) Zhang, H. Inconsistent Estimation and Asymptotically Equal Interpolations in Model-Based  
749 Geostatistics. *Journal of the American Statistical Association* **2004**, 99 (465), 250–261.  
750 <https://doi.org/10.1198/016214504000000241>.
- 751 (55) Stan Development Team. 10.3 Fitting a Gaussian Process. In *Stan User's Guide*; 2022. [https://mc-](https://mc-stan.org/docs/stan-users-guide/fit-gp.html#fit-gp.section)  
752 [stan.org/docs/stan-users-guide/fit-gp.html#fit-gp.section](https://mc-stan.org/docs/stan-users-guide/fit-gp.html#fit-gp.section).
- 753 (56) Holcomb, D. A.; Messier, K. P.; Serre, M. L.; Rowny, J. G.; Stewart, J. R. Geostatistical Prediction  
754 of Microbial Water Quality Throughout a Stream Network Using Meteorology, Land Cover, and  
755 Spatiotemporal Autocorrelation. *Environmental Science & Technology* **2018**, 52 (14), 7775–7784.  
756 <https://doi.org/10.1021/acs.est.8b01178>.
- 757 (57) Peterson, E. E.; Theobald, D. M.; Ver Hoef, J. M. Geostatistical Modelling on Stream Networks:  
758 Developing Valid Covariance Matrices Based on Hydrologic Distance and Stream Flow.  
759 *Freshwater Biology* **2007**, 52 (2), 267–279. <https://doi.org/10.1111/j.1365-2427.2006.01686.x>.
- 760 (58) Karthikeyan, S.; Levy, J. I.; De Hoff, P.; Humphrey, G.; Birmingham, A.; Jepsen, K.; Farmer, S.;  
761 Tubb, H. M.; Valles, T.; Tribelhorn, C. E.; Tsai, R.; Aigner, S.; Sathe, S.; Moshiri, N.; Henson,  
762 B.; Mark, A. M.; Hakim, A.; Baer, N. A.; Barber, T.; Belda-Ferre, P.; Chacón, M.; Cheung, W.;  
763 Cresini, E. S.; Eisner, E. R.; Lastrella, A. L.; Lawrence, E. S.; Marotz, C. A.; Ngo, T. T.;  
764 Ostrander, T.; Plascencia, A.; Salido, R. A.; Seaver, P.; Smoot, E. W.; McDonald, D.; Neuhard,  
765 R. M.; Scioscia, A. L.; Satterlund, A. M.; Simmons, E. H.; Abelman, D. B.; Brenner, D.; Bruner,  
766 J. C.; Buckley, A.; Ellison, M.; Gattas, J.; Gonias, S. L.; Hale, M.; Hawkins, F.; Ikeda, L.; Jhaveri,  
767 H.; Johnson, T.; Kellen, V.; Kremer, B.; Matthews, G.; McLawhon, R. W.; Ouillet, P.; Park, D.;  
768 Pradenas, A.; Reed, S.; Riggs, L.; Sanders, A.; Sollenberger, B.; Song, A.; White, B.; Winbush,  
769 T.; Aceves, C. M.; Anderson, C.; Gangavarapu, K.; Hufbauer, E.; Kurzban, E.; Lee, J.; Matteson,  
770 N. L.; Parker, E.; Perkins, S. A.; Ramesh, K. S.; Robles-Sikisaka, R.; Schwab, M. A.; Spencer, E.;  
771 Wohl, S.; Nicholson, L.; Mchardy, I. H.; Dimmock, D. P.; Hobbs, C. A.; Bakhtar, O.; Harding,  
772 A.; Mendoza, A.; Bolze, A.; Becker, D.; Cirulli, E. T.; Isaksson, M.; Schiabor Barrett, K. M.;  
773 Washington, N. L.; Malone, J. D.; Schafer, A. M.; Gurfield, N.; Stous, S.; Fielding-Miller, R.;  
774 Garfein, R. S.; Gaines, T.; Anderson, C.; Martin, N. K.; Schooley, R.; Austin, B.; MacCannell, D.  
775 R.; Kingsmore, S. F.; Lee, W.; Shah, S.; McDonald, E.; Yu, A. T.; Zeller, M.; Fisch, K. M.;  
776 Longhurst, C.; Maysent, P.; Pride, D.; Khosla, P. K.; Laurent, L. C.; Yeo, G. W.; Andersen, K.  
777 G.; Knight, R. Wastewater Sequencing Reveals Early Cryptic SARS-CoV-2 Variant  
778 Transmission. *Nature* **2022**. <https://doi.org/10.1038/s41586-022-05049-6>.
- 779 (59) Smyth, D. S.; Trujillo, M.; Gregory, D. A.; Cheung, K.; Gao, A.; Graham, M.; Guan, Y.;  
780 Guldenpfennig, C.; Hoxie, I.; Kannoly, S.; Kubota, N.; Lyddon, T. D.; Markman, M.; Rushford,  
781 C.; San, K. M.; Sompanya, G.; Spagnolo, F.; Suarez, R.; Teixeira, E.; Daniels, M.; Johnson, M.  
782 C.; Dennehy, J. J. Tracking Cryptic SARS-CoV-2 Lineages Detected in NYC Wastewater. *Nature*  
783 *Communications* **2022**, 13 (1), 635. <https://doi.org/10.1038/s41467-022-28246-3>.
- 784 (60) Jahn, K.; Dreifuss, D.; Topolsky, I.; Kull, A.; Ganesanandamoorthy, P.; Fernandez-Cassi, X.;  
785 Bänziger, C.; Devaux, A. J.; Stachler, E.; Caduff, L.; Cariti, F.; Corzón, A. T.; Fuhrmann, L.;  
786 Chen, C.; Jablonski, K. P.; Nadeau, S.; Feldkamp, M.; Beisel, C.; Aquino, C.; Stadler, T.; Ort, C.;  
787 Kohn, T.; Julian, T. R.; Beerwinkler, N. Early Detection and Surveillance of SARS-CoV-2  
788 Genomic Variants in Wastewater Using COJAC. *Nature Microbiology* **2022**.  
789 <https://doi.org/10.1038/s41564-022-01185-x>.
- 790 (61) Simpson, G. L. *Extrapolating with B Splines and GAMs*; Blog post; 2020.  
791 [https://web.archive.org/web/20231003073128/https://fromthebottomoftheheap.net/2020/06/03/ext-](https://web.archive.org/web/20231003073128/https://fromthebottomoftheheap.net/2020/06/03/extrapolating-with-gams/)  
792 [rapolating-with-gams/](https://web.archive.org/web/20231003073128/https://fromthebottomoftheheap.net/2020/06/03/extrapolating-with-gams/).
- 793 (62) CDC. *About Wastewater Data: Data Methods*; Website; Centers for Disease Control and  
794 Prevention, 2023.

795 <https://web.archive.org/web/20231204153532/https://www.cdc.gov/nwss/about-data.html#data->  
796 [method.](https://web.archive.org/web/20231204153532/https://www.cdc.gov/nwss/about-data.html#data-)

797 (63) Li, X.; Liu, H.; Gao, L.; Sherchan, S. P.; Zhou, T.; Khan, S. J.; van Loosdrecht, M. C. M.; Wang,  
798 Q. Wastewater-Based Epidemiology Predicts COVID-19-Induced Weekly New Hospital  
799 Admissions in over 150 USA Counties. *Nature Communications* **2023**, *14* (1), 4548.  
800 <https://doi.org/10.1038/s41467-023-40305-x>.

801

802
